# Supplementary material for: Modeling Natural Anti-Inflammatory Compounds by Molecular Topology
Source: PubMed Central journal article supplement (PMC3257142; doi:10.3390/ijms12129481), 2011-12-20
Supplement: ijms-12-09481-s001.pdf [file ijms-12-09481-s001.pdf]

# Supplementary Material

**Annex 1.** Compounds used in the training set and results obtained applying the linear discriminant analysis (Eq. 1) to anti-inflammatory natural compounds.

| COMPOUND                                  | TII    | ATS7m | ATS4v | ATS7v | ATS1p | DF    | Predicted |
|-------------------------------------------|--------|-------|-------|-------|-------|-------|-----------|
|                                           |        |       |       |       |       | value | activity  |
| <b>Active Group</b>                       |        |       |       |       |       |       |           |
| 2',3-DIHYDROXY-4,4',6'-TRIMETHOXYCHALCONE | 43.43  | 3.32  | 3.28  | 2.94  | 3.05  | -1.1  | I         |
| 2',4-DIHYDROXY-3,4',6'-TRIMETHOXYCHALCONE | 43.34  | 3.32  | 3.28  | 2.94  | 3.05  | -1.1  | I         |
| 2-ACETILPYRROLE                           | 0      | 0     | 1.39  | 0     | 2.04  | 0.38  | I         |
| 2-HYDROXY-3,4-DIMETHOXY BENZOIC ACID      | 0      | 1.3   | 2.52  | 0.71  | 2.41  | -1.29 | I         |
| 4-METHOXY-4'-HYDROXY-DALBERGIONE          | 26.84  | 2.94  | 3.23  | 2.45  | 2.96  | -0.82 | I         |
| 4-METHOXYDALBERGIONE                      | 24.37  | 2.71  | 3.21  | 2.31  | 2.94  | -1.3  | I         |
| 4'-METHOXYFLAVONE                         | 33.69  | 3.11  | 3.11  | 2.81  | 2.98  | -1.08 | I         |
| ABRINE (L)                                | 19.07  | 2.35  | 2.76  | 1.91  | 2.74  | -0.06 | I         |
| ACACETIN                                  | 50.82  | 3.03  | 3.15  | 2.65  | 3.01  | 0.02  | I         |
| ALLICIN                                   | -11.05 | 0.69  | 1.83  | 0.69  | 2.47  | 5.12  | A         |
| AMYGDALIN                                 | 135.88 | 4.07  | 3.45  | 3.47  | 3.28  | 2.27  | A         |
| ANETHOLE                                  | 0      | 1.2   | 2.14  | 0.92  | 2.39  | -0.04 | I         |
| APIGENIN                                  | 44.89  | 2.91  | 3.07  | 2.53  | 2.98  | 0.8   | A         |
| ARTENIMOL                                 | 45.24  | 1.2   | 3.38  | 0.92  | 2.97  | 1.77  | A         |
| ARZANOL                                   | 52.34  | 3.88  | 3.68  | 3.49  | 3.28  | -1.08 | I         |
| ASARININ (-)                              | 173.69 | 3.52  | 3.45  | 3.12  | 3.24  | 1.1   | A         |
| ASTAXANTHIN                               | 191    | 3.85  | 4.05  | 3.74  | 3.78  | 5.8   | A         |
| AUSTRICINE                                | 34.29  | 1.69  | 3.38  | 0.83  | 2.96  | 5.2   | A         |
| AZELAIC ACID                              | -23.92 | 2.12  | 2.09  | 1.62  | 2.38  | -0.74 | I         |
| BENZYL ISOTHIOCYANATE                     | 0      | 1.3   | 1.87  | 0.74  | 2.39  | 5.4   | A         |
| BERGAPTEN                                 | 26     | 1.61  | 2.91  | 0.93  | 2.72  | 2.48  | A         |
| BIOCHANIN A                               | 50.47  | 2.99  | 3.18  | 2.61  | 3.01  | -0.11 | I         |
| BISABOLOL                                 | 0      | 2.2   | 2.74  | 2.2   | 2.8   | -1.36 | I         |
| CADINENE                                  | 13.39  | 0     | 3.05  | 0     | 2.83  | 3.65  | A         |
| CAFFEIC ACID                              | 0      | 2.15  | 2.15  | 1.12  | 2.47  | 5.73  | A         |
| CARMINIC ACID                             | 185.61 | 4.31  | 3.93  | 3.6   | 3.44  | 1.26  | A         |
| CARNOSOL                                  | 72.73  | 2.85  | 3.78  | 2.64  | 3.23  | -1.93 | I         |
| CARYOPHYLLENE                             | 12.95  | 0     | 3.14  | 0     | 2.83  | 2.59  | A         |
| CELASTROL                                 | 167.15 | 3.9   | 4.23  | 3.66  | 3.58  | -1.03 | I         |
| CEPHARANTHINE                             | 443.28 | 4.81  | 4.34  | 4.54  | 3.79  | -0.61 | I         |
| CHAMAZULENE                               | 11.72  | 0     | 2.89  | 0     | 2.77  | 3.75  | A         |
| CHICORIC ACID                             | 94.06  | 3.93  | 3.48  | 3.35  | 3.35  | 4.46  | A         |
| CHLORO~1                                  | 48.22  | 3.36  | 3.09  | 2.78  | 3.07  | 3.29  | A         |
| CHRYSIN                                   | 40.1   | 2.75  | 3.04  | 2.45  | 2.96  | 0.33  | I         |
| CHRYSOPTANOL                              | 34.07  | 2.04  | 3.27  | 1.8   | 2.99  | 0.43  | I         |
| CITRININ                                  | 17.98  | 1.99  | 3.17  | 1.4   | 2.82  | 0.2   | I         |
| CORTISONE                                 | 89.09  | 3.39  | 3.83  | 2.95  | 3.31  | -0.21 | I         |
| COUMARIN                                  | 6.89   | 0     | 2.02  | 0     | 2.43  | 4.14  | A         |
| CROCETIN                                  | -70.98 | 3.25  | 3.05  | 2.95  | 3.08  | 2.59  | A         |
| CRUSTECDYSONE                             | 171.69 | 3.85  | 4.09  | 3.55  | 3.53  | -0.08 | I         |
| CURCUMIN                                  | 65.37  | 3.46  | 3.27  | 3.03  | 3.2   | 3.25  | A         |
| CYANIDIN                                  | 49.15  | 3.14  | 3.11  | 2.61  | 3.01  | 1.51  | A         |
| CYTISINE                                  | 18.37  | 0     | 2.69  | 0     | 2.68  | 3.41  | A         |
| DAPHNETIN                                 | 9.68   | 0     | 2.29  | 0     | 2.51  | 3.2   | A         |
| DHA                                       | -84.25 | 2.93  | 3     | 2.84  | 3.13  | 3.91  | A         |
| DIMETHYLCAFFEIC ACID                      | 0      | 2.36  | 2.61  | 1.62  | 2.54  | -1.02 | I         |
| DIOSGENIN                                 | 175.97 | 3.59  | 3.99  | 3.42  | 3.51  | 0.05  | I         |
| EMODIN                                    | 37.7   | 2.34  | 3.32  | 1.95  | 3.01  | 0.73  | I         |
| ENOXOLONE                                 | 173.87 | 4.02  | 4.3   | 3.75  | 3.61  | -1.28 | I         |
| EPA                                       | -70.79 | 2.81  | 2.89  | 2.71  | 3.04  | 2.93  | A         |
| ERGOSTA-7,22-DIEN-3-ONE                   | 138.78 | 3.55  | 3.91  | 3.5   | 3.48  | -0.53 | I         |

## Annex 1. Cont.

|                             |        |      |      |      |      |       |   |
|-----------------------------|--------|------|------|------|------|-------|---|
| ERGOSTEROL                  | 138.78 | 3.55 | 3.91 | 3.5  | 3.48 | -0.53 | I |
| ERYTHRODIOL                 | 154.1  | 3.76 | 4.25 | 3.64 | 3.58 | -1.76 | I |
| ESCULETIN                   | 9.8    | 1.02 | 2.23 | 0.23 | 2.51 | 7.47  | A |
| ESCULIN                     | 69.39  | 3.48 | 3.14 | 2.89 | 3.02 | 0.84  | A |
| EUGENOL                     | 0      | 1.2  | 2.31 | 0.92 | 2.43 | -0.85 | I |
| FARNESOL                    | -32.85 | 2.34 | 2.64 | 2.25 | 2.74 | -1.54 | I |
| FORMONONETIN                | 46.73  | 2.85 | 3.1  | 2.53 | 2.98 | 0.08  | I |
| FRAXETIN                    | 13.17  | 1.33 | 2.61 | 0.82 | 2.58 | 1.45  | A |
| GALACTURONICACID            | -17.66 | 1.52 | 2.07 | 0.42 | 2.22 | 2.28  | A |
| GAMBOGIC ACID               | 443.87 | 4.8  | 4.42 | 4.5  | 3.83 | -0.08 | I |
| GENTISIC ACID               | 0      | 0    | 1.81 | 0    | 2.28 | 2.45  | A |
| GOSSYPOL                    | 192.31 | 4.2  | 4.33 | 3.86 | 3.63 | -1.02 | I |
| HAEMATOMIC ACID             | 0      | 0    | 2.52 | 0    | 2.51 | 0.47  | I |
| HECOGENIN                   | 184.19 | 3.7  | 4.04 | 3.47 | 3.52 | -0.02 | I |
| HERNIARIN                   | 10.39  | 1.2  | 2.33 | 0.92 | 2.51 | 1.02  | A |
| HESPERETIN                  | 55.06  | 3.22 | 3.22 | 2.73 | 3.03 | 0.19  | I |
| HOMOVANILLICACID            | 0      | 1.98 | 2.31 | 0.94 | 2.42 | 3.11  | A |
| HYDROXYTYROSOL              | 0      | 1.02 | 1.88 | 0.23 | 2.34 | 6.81  | A |
| HYPERICIN                   | 256.55 | 4.57 | 4.57 | 4.05 | 3.73 | -1.04 | I |
| IMPERATORIN                 | 50.32  | 3.01 | 3.09 | 2.68 | 2.95 | -1.07 | I |
| IRIDIN                      | 217.19 | 4.28 | 3.86 | 3.72 | 3.42 | 0.17  | I |
| ISOGINKGETIN                | 416.72 | 4.49 | 4.14 | 4.11 | 3.7  | 1.39  | A |
| ISOPEONOL                   | 0      | 0    | 2.31 | 0    | 2.38 | -0.68 | I |
| KAEMPFEROL                  | 47.91  | 3.09 | 3.16 | 2.57 | 3.01 | 1     | A |
| KOJIC ACID                  | 0      | 0    | 1.46 | 0    | 2.11 | 1.62  | A |
| KOPARIN                     | 54.36  | 3.12 | 3.24 | 2.68 | 3.03 | -0.18 | I |
| LEUCODIN                    | 31.32  | 1.69 | 3.28 | 0.83 | 2.94 | 5.71  | A |
| LIMONENE                    | 0      | 0    | 1.95 | 0    | 2.4  | 4.13  | A |
| LINALOOL (+)                | -14.9  | 1.1  | 2.02 | 1.1  | 2.35 | -1.96 | I |
| LINALYL ACETATE             | -21.95 | 1.99 | 2.64 | 1.87 | 2.52 | -6.52 | I |
| LINAMARIN                   | 0      | 2.56 | 2.67 | 1.76 | 2.59 | -0.65 | I |
| LINOLEICACID                | -58.5  | 2.69 | 2.77 | 2.57 | 2.94 | 1.96  | A |
| LUPININE                    | 8.62   | 0    | 2.43 | 0    | 2.51 | 1.64  | A |
| LUTEOLIN                    | 49.29  | 3.13 | 3.11 | 2.63 | 3.01 | 1.23  | A |
| LYCOPENE                    | -195.8 | 3.66 | 3.76 | 3.66 | 3.69 | 8.11  | A |
| MANDELIC ACID, METHYL ESTER | 0      | 0.69 | 2.15 | 0.69 | 2.38 | -1.21 | I |
| NARINGIN                    | 357.18 | 4.51 | 3.85 | 3.93 | 3.57 | 3.3   | A |
| NOBILETIN                   | 89.53  | 3.67 | 3.76 | 3.27 | 3.17 | -4.65 | I |
| NORDIHYDROGUARETIC ACID     | 38.91  | 3.16 | 3.09 | 2.84 | 3.08 | 2.04  | A |
| OLEUROPEIN                  | 193.64 | 4.18 | 3.73 | 3.72 | 3.44 | 1.78  | A |
| ORSELLINIC ACID             | 0      | 0    | 2.19 | 0    | 2.38 | 0.8   | A |
| PARTHENOLIDE                | 32.76  | 1.79 | 3.24 | 1.26 | 2.91 | 1.85  | A |
| PEONIFLORIN                 | 244.22 | 4.44 | 3.62 | 3.88 | 3.41 | 1.87  | A |
| PHENETHYLISOTHIOCYANATE     | 0      | 1.99 | 2.01 | 1.43 | 2.48 | 3.78  | A |
| PHLOROACETOPHENONE          | 0      | 0    | 2.19 | 0    | 2.38 | 0.81  | A |
| PICROCROCIN                 | 34.58  | 3.4  | 3.21 | 3    | 3    | -1.87 | I |
| PIMPINELLIN                 | 32.7   | 1.63 | 3.18 | 1.02 | 2.78 | 0.29  | I |
| PINENE                      | 5.89   | 0    | 1.79 | 0    | 2.49 | 8.43  | A |
| PRISTIMERIN                 | 180.76 | 4    | 4.27 | 3.78 | 3.59 | -1.79 | I |
| PROANTHOCYANIDINS/E         | 402.08 | 4.7  | 4.21 | 4.26 | 3.71 | 0.79  | A |
| PSORALEN                    | 19.55  | 1.3  | 2.51 | 0.71 | 2.66 | 5.77  | A |
| PTEROSTILBENE               | 28.6   | 2.87 | 2.88 | 2.61 | 2.91 | -0.06 | I |
| PYRIDOXINE                  | 0      | 0    | 2.19 | 0    | 2.36 | 0.26  | I |
| RESERPINE                   | 456.56 | 4.47 | 4.23 | 4.07 | 3.67 | -0.22 | I |
| RESVERATROL                 | 23.12  | 2.75 | 2.63 | 2.45 | 2.85 | 2.29  | A |
| RHAMNOSE                    | -13.25 | 0    | 1.85 | 0    | 2.11 | -2.89 | I |
| ROSMARINIC ACID             | 55.96  | 3.6  | 3.14 | 2.99 | 3.14 | 4.03  | A |
| RUTIN                       | 392.19 | 4.68 | 3.88 | 4.07 | 3.6  | 3.12  | A |
| SAFRANAL                    | 0      | 0    | 2.26 | 0    | 2.44 | 1.61  | A |
| SAFROLE                     | 9.9    | 1.2  | 2.26 | 0.92 | 2.47 | 0.88  | A |
| SPATHULENOL                 | 25.7   | 0    | 3.2  | 0    | 2.92 | 4.12  | A |

## Annex 1. Cont.

|                                                            |        |      |      |      |      |       |   |
|------------------------------------------------------------|--------|------|------|------|------|-------|---|
| S-PROPENYLCYSTEINE                                         | -14.41 | 1.3  | 1.92 | 0.71 | 2.38 | 4.96  | A |
| SQUALENE                                                   | -112   | 3.3  | 3.43 | 3.3  | 3.4  | 4.52  | A |
| STIGMASTEROL                                               | 150.8  | 3.6  | 3.97 | 3.56 | 3.51 | -0.64 | I |
| STROPHANTHIDIN                                             | 141.2  | 3.61 | 3.96 | 3.22 | 3.41 | -0.2  | I |
| SYRINGIC                                                   | 0      | 1.47 | 2.63 | 1.26 | 2.45 | -5.57 | I |
| THYMOL                                                     | 0      | 0    | 2.2  | 0    | 2.44 | 2.26  | A |
| TRIGONELLINE                                               | 0      | 0    | 1.75 | 0    | 2.17 | -0.03 | I |
| TRYPTANTHRIN                                               | 46.99  | 2.23 | 3.22 | 2.14 | 3    | -0.89 | I |
| URSOLIC ACID                                               | 162.65 | 3.83 | 4.32 | 3.65 | 3.59 | -1.99 | I |
| USNIC ACID                                                 | 59.31  | 3.43 | 3.7  | 2.75 | 3.16 | -0.6  | I |
| VULPINIC ACID                                              | 70.78  | 3.28 | 3.45 | 3    | 3.14 | -1.4  | I |
| <b>Inactive Group</b>                                      |        |      |      |      |      |       |   |
| 1(2)alpha-EPOXYDEOXY<br>DIHYDROGEDUNIN                     | 233.41 | 4.3  | 4.33 | 3.9  | 3.56 | -3.18 | I |
| 1,2alpha-EPOXY-7-DEACETOXY-<br>7-OXODIHYDROGEDUNIN         | 231.31 | 3.91 | 4.27 | 3.5  | 3.53 | -1.89 | I |
| 1,3-DIDEACETYLDEOXYKHIVORIN                                | 192.05 | 4.3  | 4.33 | 3.9  | 3.54 | -3.31 | I |
| 1,4,5,8-TETRAHYDROXY-<br>2,6-DIMETHYLANTHROQUINONE         | 44.2   | 2.92 | 3.48 | 2.36 | 3.08 | 0.4   | I |
| 1,7-DIDEACETOXY-1,7-<br>DIOXOKHIVORIN                      | 246.72 | 4.09 | 4.36 | 3.7  | 3.57 | -2.51 | I |
| 10-HYDROXYCAMPTOTHECIN                                     | 123.4  | 3.54 | 3.66 | 3.17 | 3.29 | -0.03 | I |
| 11alpha-ACETOXYKHIVORIN                                    | 385.91 | 5.05 | 4.63 | 4.55 | 3.73 | -4.13 | I |
| 11-OXOURSOLIC ACID ACETATE                                 | 209.54 | 4.14 | 4.45 | 3.85 | 3.66 | -1.98 | I |
| 12a-HYDROXY-5-DEOXYDE<br>HYDROMUNDUSERONE                  | 87.88  | 3.43 | 3.52 | 2.99 | 3.14 | -1.58 | I |
| 12a-HYDROXY-9-<br>DEMETHYLMUNDUSERONE<br>8-CARBOXYLIC ACID | 104.89 | 3.75 | 3.71 | 3.1  | 3.22 | -0.85 | I |
| 1-METHYLXANTHINE                                           | 8.29   | 0    | 2.07 | 0    | 2.26 | -1.5  | I |
| 1R,9S-HYDRASTINE                                           | 147.23 | 3.72 | 3.73 | 3.28 | 3.25 | -1.99 | I |
| 2,3-DIHYDROISOGEDUNIN                                      | 229.28 | 4.29 | 4.34 | 3.89 | 3.56 | -3.29 | I |
| 2,3-DIHYDROXY-4-METHOXY-<br>4'-ETHOXYBENZOPHENONE          | 31.28  | 3    | 3.14 | 2.53 | 2.95 | -0.38 | I |
| 2,3-METHANO-7,2'-<br>DIMETHOXYFLAVANONE                    | 76.1   | 2.91 | 3.42 | 2.71 | 3.1  | -1.85 | I |
| 2,5-DIHYDROXY-3,4-DIMETHOXY-<br>4'-ETHOXYBENZOPHENONE      | 35.93  | 3.21 | 3.33 | 2.75 | 3    | -2.09 | I |
| 2'-METHOXYFORMONETIN                                       | 55.35  | 3.09 | 3.29 | 2.75 | 3.03 | -1.6  | I |
| 2-METHOXYRESORCINOL                                        | 0      | 0    | 1.76 | 0    | 2.18 | -0.08 | I |
| 2-METHYLENE-5-(2,5-DIOXO)                                  | 53.08  | 3.03 | 3.52 | 2.65 | 3.1  | -1.51 | I |
| 3,4',5,6,7-PENTAMETHOXYFLAVONE                             | 77.87  | 3.6  | 3.65 | 3.16 | 3.13 | -3.86 | I |
| 3,4,5-<br>TRIMETHOXYCINNAMALDEHYDE                         | 0      | 2.32 | 2.86 | 1.71 | 2.58 | -3.94 | I |
| 3',4'-DIMETHOXYFLAVONE                                     | 51.89  | 3.08 | 3.22 | 2.73 | 3.01 | -1.19 | I |
| 3,5-DIHYDROXYFLAVONE                                       | 39.24  | 2.57 | 3.09 | 2.36 | 2.96 | -0.43 | I |
| 3beta-<br>ACETOXYDEOXODIHYDROGEDUNIN                       | 279.33 | 4.42 | 4.42 | 4.02 | 3.61 | -3.37 | I |
| 3beta-ACETOXYDEOXYANGOLENSIC<br>ACID METHYL ESTER          | 223.48 | 4.27 | 4.35 | 3.88 | 3.55 | -3.48 | I |
| 3-DEOXO-3beta-HYDROXY<br>MEXICANOLIDE 16-ENOL ETHER        | 204.13 | 4.17 | 4.26 | 3.77 | 3.53 | -2.58 | I |
| 3-HYDROXYFLAVONE                                           | 35.68  | 2.34 | 3.02 | 2.25 | 2.94 | -0.61 | I |
| 3-METHOXYCATECHOL                                          | 0      | 0    | 1.67 | 0    | 2.18 | 1.01  | A |
| 3-METHYLORSELLINIC ACID                                    | 0      | 0    | 2.39 | 0    | 2.47 | 0.97  | A |
| 4,4'-DIMETHOXYDALBERGIONE                                  | 29.89  | 3.04 | 3.31 | 2.61 | 2.98 | -1.97 | I |
| 4-HYDROXY-6-METHYLPYRAN-2-<br>ONE                          | 0      | 0    | 1.4  | 0    | 2.06 | 0.68  | I |
| 4-O-METHYLPHLORACETOPHENONE                                | 0      | 1.2  | 2.39 | 0.92 | 2.42 | -2.03 | I |
| 5,2'-DIMETHOXYFLAVONE                                      | 50.43  | 3    | 3.3  | 2.71 | 3.01 | -2.53 | I |
| 5,7-DIHYDROXYISOFLAVONE                                    | 39.82  | 2.57 | 3.07 | 2.36 | 2.96 | -0.16 | I |
| 5,7-DIMETHOXYISOFLAVONE                                    | 49.48  | 2.85 | 3.27 | 2.64 | 3.01 | -2.36 | I |

## Annex 1. Cont.

|                                         |        |      |      |      |      |       |   |
|-----------------------------------------|--------|------|------|------|------|-------|---|
| 6,3'-DIMETHOXYFLAVONE                   | 52.15  | 2.95 | 3.19 | 2.66 | 3.01 | -1.04 | I |
| 6,4'-DIMETHOXYFLAVONE                   | 52.49  | 2.87 | 3.17 | 2.61 | 3.01 | -0.75 | I |
| 6-ACETOXYANGOLENSIC ACID METHYL ESTER   | 234.38 | 4.31 | 4.39 | 3.86 | 3.57 | -3.13 | I |
| 6-HYDROXYANGOLENSIC                     | 195.65 | 4.06 | 4.31 | 3.65 | 3.51 | -3.08 | I |
| 7,2'-DIMETHOXYFLAVONE                   | 51.1   | 3.11 | 3.23 | 2.81 | 3.01 | -1.98 | I |
| 7-DEACETYLKHIVORIN                      | 291.13 | 4.42 | 4.44 | 4.02 | 3.62 | -3.29 | I |
| 7-DESACETOXY-6,7-DEHYDROGEDUNIN         | 181.1  | 3.76 | 4.19 | 3.42 | 3.49 | -1.97 | I |
| 7-OXOCALLITRISIC ACID, METHYL ESTER     | 57.49  | 3.03 | 3.76 | 2.81 | 3.21 | -2.72 | I |
| 7-OXOCHOLESTEROL                        | 134.1  | 3.51 | 3.94 | 3.4  | 3.46 | -0.72 | I |
| 7-OXOCHOLESTERYL ACETATE                | 165.35 | 3.78 | 4.04 | 3.61 | 3.52 | -0.7  | I |
| 8,2'-DIMETHOXYFLAVONE                   | 50.36  | 3.13 | 3.28 | 2.79 | 3.01 | -2.31 | I |
| 8beta-HYDROXYCARAPIN 3,8-HEMIACETAL     | 230.38 | 4.16 | 4.33 | 3.69 | 3.54 | -2.41 | I |
| 8-HYDROXY-15,16-BISNOR-11-LABDEN-13-ONE | 24.02  | 2.4  | 3.51 | 2.14 | 3.04 | -2.04 | I |
| 8-HYDROXYCARAPINIC ACID                 | 183.88 | 4.1  | 4.27 | 3.59 | 3.51 | -1.75 | I |
| 8-IODOCATECHIN TETRAMETHYL ETHER        | 75.15  | 3.97 | 3.67 | 3.18 | 3.22 | 0.39  | I |
| ABIETIC ACID                            | 48.73  | 2.85 | 3.64 | 2.64 | 3.17 | -1.78 | I |
| ABSCISIC ACID (cis,trans; +/-)          | 0      | 2.9  | 3.1  | 2.41 | 2.88 | -1.16 | I |
| ACACETIN DIACETATE                      | 85.86  | 3.6  | 3.54 | 3.23 | 3.18 | -1.79 | I |
| ACETOSYRINGONE                          | 0      | 0    | 2.56 | 0    | 2.46 | -1.22 | I |
| ACONITIC ACID                           | -15.95 | 0    | 2.1  | 0    | 2.17 | -4.29 | I |
| AJMALINE                                | 98.68  | 2.63 | 3.81 | 2.46 | 3.28 | -0.5  | I |
| ALBIZZIINE                              | -12.45 | 0    | 1.53 | 0    | 1.93 | -4.53 | I |
| alpha-MANGOSTIN                         | 103.46 | 4    | 3.84 | 3.65 | 3.37 | -1.43 | I |
| alpha-TOXICAROL                         | 150.65 | 3.78 | 3.82 | 3.36 | 3.35 | -0.75 | I |
| AMBELLINE                               | 93.59  | 3.13 | 3.64 | 2.63 | 3.13 | -1.55 | I |
| ANDIROBIN                               | 215.52 | 4.05 | 4.17 | 3.67 | 3.5  | -2.19 | I |
| ANDROGRAPHOLIDE                         | 74.04  | 3.7  | 3.63 | 3.21 | 3.21 | -1.19 | I |
| ANGOLENSIC ACID. METHYL ESTER           | 187.06 | 4.01 | 4.26 | 3.62 | 3.5  | -2.87 | I |
| ANGOLENSIN (R)                          | 29.1   | 2.97 | 3.07 | 2.63 | 2.96 | -0.42 | I |
| ANHYDROBRAZILIC ACID                    | 19.01  | 2.4  | 2.81 | 1.8  | 2.72 | 0.14  | I |
| ANTHOTHECOL                             | 227.98 | 4.25 | 4.37 | 3.84 | 3.57 | -2.86 | I |
| ANTIAROL                                | 0      | 0    | 2.48 | 0    | 2.32 | -4.35 | I |
| APHYLLIC ACID                           | 41.17  | 2.74 | 3.16 | 2.46 | 2.95 | -1.7  | I |
| APIOLE                                  | 16.55  | 1.67 | 2.95 | 1.51 | 2.61 | -5.98 | I |
| ASIATIC ACID                            | 182.51 | 3.99 | 4.38 | 3.73 | 3.62 | -1.86 | I |
| ATRANORIN                               | 48.15  | 3.52 | 3.48 | 3.2  | 3.16 | -1.7  | I |
| AZADIRACHTIN                            | 619.77 | 5.21 | 4.68 | 4.65 | 3.82 | -3.47 | I |
| BACCATIN III                            | 278.44 | 4.9  | 4.44 | 4.38 | 3.66 | -2.78 | I |
| beta-AMYRIN                             | 144.36 | 3.66 | 4.22 | 3.6  | 3.57 | -1.91 | I |
| beta-AMYRIN ACETATE                     | 183.21 | 3.87 | 4.32 | 3.76 | 3.62 | -2.07 | I |
| beta-ESCIN                              | 2640.9 | 5.39 | 4.92 | 4.91 | 4.3  | -3.62 | I |
| beta-MANGOSTIN                          | 380.49 | 4.85 | 4.48 | 4.52 | 3.82 | -0.71 | I |
| beta-PELTATIN                           | 162.63 | 4.19 | 3.88 | 3.55 | 3.31 | -2.05 | I |
| beta-TOXICAROL                          | 152.26 | 3.79 | 3.8  | 3.41 | 3.35 | -0.88 | I |
| BETULINIC ACID                          | 161.91 | 3.76 | 4.25 | 3.57 | 3.57 | -1.63 | I |
| BIOCHANIN A DIACETATE                   | 85.5   | 3.64 | 3.56 | 3.26 | 3.18 | -2.08 | I |
| BIOCHANIN A. 7-METHYL ETHER             | 55.86  | 3.1  | 3.26 | 2.71 | 3.03 | -0.79 | I |
| BIOCHANIN A. DIMETHYL ETHER             | 60.82  | 3.19 | 3.37 | 2.84 | 3.05 | -2.12 | I |
| BISABOLOL ACETATE                       | 0      | 2.81 | 3.14 | 2.71 | 2.91 | -4.11 | I |
| BUSSEIN                                 | 764.47 | 5.73 | 5    | 5.18 | 3.98 | -4.95 | I |
| BYSSOCHLAMIC ACID                       | 56.95  | 3.46 | 3.71 | 2.65 | 3.12 | -0.85 | I |
| CAFESTOL ACETATE                        | 121.68 | 3.39 | 3.79 | 3.03 | 3.32 | -0.1  | I |
| CARAPIN                                 | 192.89 | 4.08 | 4.23 | 3.66 | 3.51 | -2.04 | I |
| CARNOSINE                               | 0      | 2.53 | 2.6  | 1.9  | 2.55 | -2.47 | I |
| CATECHIN PENTAACETATE                   | 144.78 | 4.34 | 3.91 | 3.82 | 3.39 | -1.55 | I |
| CATECHIN TETRAMETHYLETHER               | 71.37  | 3.46 | 3.48 | 3.03 | 3.09 | -2.49 | I |

## Annex 1. Cont.

|                                               |        |      |      |      |      |       |   |
|-----------------------------------------------|--------|------|------|------|------|-------|---|
| CEDRELONE                                     | 179.55 | 3.66 | 4.23 | 3.37 | 3.5  | -2.09 | I |
| CELLOBIOSE (D[+])                             | 33.97  | 3.62 | 3.04 | 2.8  | 2.85 | -0.98 | I |
| CENTAUREIN                                    | 211.56 | 4.34 | 3.87 | 3.75 | 3.42 | 0.19  | I |
| CEPHALOTAXINE                                 | 84.93  | 3.15 | 3.67 | 2.59 | 3.14 | -1.17 | I |
| CHELIDONINE (+)                               | 128.03 | 3.47 | 3.75 | 3    | 3.26 | -0.83 | I |
| CHOLESTAN-3beta,5alpha,6beta-TRIOL            | 139.9  | 3.58 | 3.98 | 3.44 | 3.48 | -0.62 | I |
| CHOLESTERYL ACETATE                           | 159.78 | 3.68 | 3.99 | 3.57 | 3.51 | -0.69 | I |
| CHONDROSINE                                   | 36.76  | 3.67 | 3.12 | 2.89 | 2.89 | -1.38 | I |
| CHRYSANTHEMIC ACID. ETHYL ESTER               | 0      | 1.39 | 2.68 | 1.39 | 2.59 | -3.78 | I |
| CHUKRASIN METHYL ETHER                        | 715.41 | 5.61 | 5.02 | 5.1  | 3.95 | -6.05 | I |
| CINCHONIDINE                                  | 80.94  | 3.14 | 3.35 | 3.01 | 3.16 | -0.72 | I |
| CITROPTEN                                     | 13.76  | 1.54 | 2.7  | 1.11 | 2.58 | -1.02 | I |
| CITRULLINE                                    | -18.67 | 2.21 | 1.89 | 1.4  | 2.18 | -1.74 | I |
| CLOVANEDIOL DIACETATE                         | 55.96  | 3    | 3.63 | 2.53 | 3.12 | -1.33 | I |
| COLCHICEINE                                   | 75.92  | 3.89 | 3.87 | 3.35 | 3.23 | -3.5  | I |
| COLCHICINE                                    | 81.53  | 3.97 | 3.92 | 3.47 | 3.25 | -4.28 | I |
| COLFORSIN                                     | 71.76  | 3.69 | 4.11 | 3.33 | 3.3  | -5.4  | I |
| CRYPTOTANSHINONE                              | 62.22  | 2.89 | 3.6  | 2.57 | 3.17 | -0.57 | I |
| D,L-threo-3-HYDROXYASPARTIC ACID              | -11.07 | 0    | 1.46 | 0    | 1.93 | -3.52 | I |
| DAUNORUBICIN                                  | 250.86 | 4.46 | 4.08 | 3.98 | 3.57 | 0.26  | I |
| DEACETYLGEDUNIN                               | 189.32 | 3.82 | 4.23 | 3.46 | 3.5  | -2.05 | I |
| DECAHYDROGAMBOGIC ACID                        | 488.85 | 4.92 | 4.5  | 4.62 | 3.87 | -0.57 | I |
| DEGUELIN(-)                                   | 143.41 | 3.67 | 3.78 | 3.31 | 3.33 | -0.89 | I |
| DEHYDRO (11,12)URSOLIC ACID LACTONE           | 184.12 | 3.79 | 4.35 | 3.65 | 3.61 | -2.35 | I |
| DELTALINE                                     | 181.15 | 3.39 | 4.4  | 2.92 | 3.46 | -2.6  | I |
| DEMETHYLNOBILETIN                             | 84.49  | 3.62 | 3.67 | 3.2  | 3.15 | -3.75 | I |
| DEOXYGEDUNIN                                  | 184.29 | 4.23 | 4.3  | 3.86 | 3.53 | -3.32 | I |
| DEOXYGEDUNOL ACETATE                          | 223.45 | 4.37 | 4.39 | 4    | 3.58 | -3.49 | I |
| DEOXYKHIVORIN                                 | 267.04 | 4.67 | 4.5  | 4.26 | 3.65 | -3.95 | I |
| DEOXYSAFFRONONE B 7,3'-DIMETHYL ETHER ACETATE | 86.97  | 3.41 | 3.44 | 3.03 | 3.16 | -0.43 | I |
| DERRUSTONE                                    | 90.86  | 3.35 | 3.4  | 2.9  | 3.09 | -1.09 | I |
| DIFFRACTAIC ACID                              | 47.53  | 3.57 | 3.58 | 3.28 | 3.16 | -3.28 | I |
| DIFUCOL HEXAMETHYL ETHER                      | 34.57  | 3.27 | 3.58 | 2.84 | 2.97 | -6.34 | I |
| DIHYDROCELASTRYL DIACETATE                    | 247.18 | 4.31 | 4.39 | 4.03 | 3.68 | -1.44 | I |
| DIHYDROGAMBOGIC ACID                          | 481.73 | 4.88 | 4.49 | 4.59 | 3.85 | -0.95 | I |
| DIHYDROGEDUNIC ACID METHYL ESTER              | 180.9  | 4.26 | 4.26 | 3.8  | 3.48 | -3.65 | I |
| DIHYDROJASMONIC ACID                          | 0      | 2.43 | 2.71 | 2.09 | 2.7  | -1.71 | I |
| DIHYDROMYRISTICIN                             | 13.24  | 1.47 | 2.63 | 1.26 | 2.54 | -3    | I |
| DIHYDROSAMIDIN                                | 86.63  | 3.92 | 3.69 | 3.51 | 3.22 | -3.2  | I |
| DIPROTON A                                    | 0      | 3.47 | 3.34 | 3.09 | 3.02 | -2.91 | I |
| DUARTIN (-)                                   | 65.61  | 3.28 | 3.44 | 2.91 | 3.07 | -2.6  | I |
| ECHINOCYSTIC ACID                             | 170.52 | 3.93 | 4.32 | 3.72 | 3.61 | -1.7  | I |
| ENTANDROPHRAGMIN                              | 898.5  | 5.6  | 4.88 | 5.09 | 3.99 | -3.99 | I |
| EPIAFZELECHIN TRIMETHYL ETHER                 | 61.09  | 3.25 | 3.35 | 2.84 | 3.05 | -1.54 | I |
| EPOXYGEDUNIN                                  | 280.34 | 4.36 | 4.36 | 3.93 | 3.58 | -3.01 | I |
| ERGOSTEROL ACETATE                            | 183.54 | 3.86 | 4.18 | 3.77 | 3.59 | -1.3  | I |
| ETHYL EVERNINATE                              | 0      | 1.79 | 2.67 | 1.26 | 2.54 | -1.63 | I |
| EUGENITOL                                     | 12.56  | 0.69 | 2.7  | 0.69 | 2.66 | 0.22  | I |
| EUGENYL BENZOATE                              | 30.55  | 2.96 | 3.03 | 2.78 | 2.96 | -1.28 | I |
| EUPATORIN                                     | 69.85  | 3.43 | 3.45 | 2.97 | 3.09 | -1.78 | I |
| EUPATORIOCHROMENE                             | 15.3   | 1.67 | 2.84 | 1.51 | 2.76 | -0.34 | I |
| EUPHOL ACETATE                                | 176.8  | 3.86 | 4.22 | 3.77 | 3.59 | -1.8  | I |
| EUPHORBIASTEROID                              | 298.53 | 4.56 | 4.28 | 4.2  | 3.65 | -1.45 | I |
| EVERNIC ACID                                  | 40.23  | 3.31 | 3.25 | 2.95 | 3.05 | -1.03 | I |
| EVERNINIC ACID                                | 0      | 1.3  | 2.24 | 0.71 | 2.37 | 0.8   | A |
| FISSINOLIDE                                   | 228.11 | 4.31 | 4.34 | 3.89 | 3.57 | -2.78 | I |
| FRAXIDIN METHYL ETHER                         | 17.19  | 1.81 | 2.98 | 1.33 | 2.65 | -2.95 | I |
| FREQUENTIN                                    | 0      | 2.59 | 2.84 | 2.31 | 2.82 | -0.69 | I |

## Annex 1. Cont.

|                                 |        |      |      |      |      |       |   |
|---------------------------------|--------|------|------|------|------|-------|---|
| FRIEDELIN                       | 142.51 | 3.63 | 4.24 | 3.58 | 3.57 | -2.23 | I |
| FUCOSTANOL                      | 150.8  | 3.6  | 3.97 | 3.56 | 3.51 | -0.64 | I |
| FUMARPROTOCETRARIC ACID         | 125.97 | 4.18 | 3.85 | 3.7  | 3.36 | -1.44 | I |
| GAMBOGIC ACID AMIDE             | 98.04  | 3.89 | 3.79 | 3.54 | 3.36 | -0.93 | I |
| GAMBOGIC ACID AMIDE             | 443.87 | 4.8  | 4.43 | 4.51 | 3.83 | -0.16 | I |
| GANGALEOIDIN                    | 70.07  | 3.77 | 3.73 | 3.19 | 3.2  | -2.02 | I |
| GANGLEOIDIN ACETATE             | 88.48  | 3.97 | 3.88 | 3.41 | 3.27 | -2.73 | I |
| GARDENIN B                      | 73.39  | 3.43 | 3.56 | 3.05 | 3.11 | -3.3  | I |
| GEDUNOL                         | 230.38 | 4.29 | 4.33 | 3.89 | 3.56 | -3.14 | I |
| GENKWANIN                       | 50.06  | 3.08 | 3.15 | 2.71 | 3.01 | -0.34 | I |
| GERALDOL                        | 54.15  | 3.3  | 3.23 | 2.77 | 3.03 | 0.19  | I |
| GRISEOFULVIC ACID               | 52.2   | 3.15 | 3.55 | 2.59 | 3.06 | -1.86 | I |
| GRISEOFULVIN                    | 56.93  | 3.39 | 3.65 | 2.83 | 3.08 | -3.21 | I |
| HEDERACOSIDE C                  | 2844.2 | 5.44 | 4.91 | 4.95 | 4.32 | -4.13 | I |
| HEDERAGENIN                     | 174.57 | 3.93 | 4.3  | 3.72 | 3.61 | -1.52 | I |
| HETEROPEUCENIN. METHYL ETHER    | 25.23  | 2.83 | 3.26 | 2.68 | 2.93 | -4.61 | I |
| HOMOPTEROCARPIN                 | 64.45  | 2.91 | 3.25 | 2.55 | 3.03 | -0.36 | I |
| HYDROQUINIDINE                  | 97.02  | 3.38 | 3.45 | 3.16 | 3.2  | -0.95 | I |
| HYDROXYPROGESTERONE             | 75.79  | 3.15 | 3.72 | 2.87 | 3.27 | -0.37 | I |
| HYMECROMONE METHYL ETHER        | 11.82  | 1.47 | 2.59 | 1.26 | 2.59 | -1.33 | I |
| HYOXANTHINE                     | 5.67   | 0    | 1.63 | 0    | 2.14 | 0.25  | I |
| ICHTHYNONE                      | 166.18 | 3.69 | 3.79 | 3.34 | 3.33 | -1.23 | I |
| INOSINE                         | 42.33  | 2.91 | 2.92 | 2.11 | 2.73 | -0.89 | I |
| IRETOL                          | 0      | 0    | 1.93 | 0    | 2.23 | -0.57 | I |
| ISOPIMPINELLIN                  | 32.69  | 1.79 | 3.18 | 1.26 | 2.78 | -1.03 | I |
| ISOSAFROLE                      | 9.9    | 1.2  | 2.26 | 0.92 | 2.47 | 0.88  | A |
| ISOTECTORIGENIN TRIMETHYL ETHER | 69.3   | 3.36 | 3.53 | 3    | 3.09 | -3.36 | I |
| ISOTECTORIGENIN. 7-METHYL ETHER | 64.39  | 3.25 | 3.43 | 2.84 | 3.07 | -1.98 | I |
| KAINIC ACID                     | 0      | 0    | 2.79 | 0    | 2.57 | -0.82 | I |
| KARANJIN                        | 65.16  | 2.69 | 3.31 | 2.57 | 3.08 | -1    | I |
| KHAYANTHONE                     | 322.96 | 4.67 | 4.51 | 4.26 | 3.67 | -3.61 | I |
| KHAYASIN C                      | 243.02 | 4.37 | 4.35 | 3.96 | 3.6  | -2.51 | I |
| KHELLIN                         | 35.79  | 1.61 | 3.3  | 1.61 | 2.84 | -4.9  | I |
| KHIVORIN                        | 333.82 | 4.72 | 4.52 | 4.29 | 3.67 | -3.87 | I |
| KINETIN                         | 36.46  | 2.72 | 2.55 | 2.3  | 2.65 | -1.67 | I |
| KUHLMANNIN                      | 52.07  | 3.13 | 3.44 | 2.63 | 3.03 | -2.04 | I |
| LAGOCHILIN                      | 61.47  | 3.36 | 3.83 | 2.84 | 3.21 | -2.14 | I |
| LANOSTEROL                      | 146.22 | 3.66 | 4.11 | 3.61 | 3.54 | -1.62 | I |
| LAPACHOL                        | 21.17  | 2.37 | 3.04 | 2.2  | 2.91 | -0.88 | I |
| LAPPACONITINE                   | 416.24 | 4.44 | 4.48 | 4.08 | 3.7  | -2.53 | I |
| LARIXOL                         | 30.12  | 3.01 | 3.61 | 2.84 | 3.13 | -3.47 | I |
| LARIXOL ACETATE                 | 38.35  | 3.26 | 3.76 | 3.05 | 3.21 | -3.53 | I |
| LECANORIC ACID                  | 36.97  | 3.21 | 3.17 | 2.9  | 3.03 | -0.77 | I |
| LEOIDIN DIMETHYL ETHER          | 78.86  | 3.99 | 3.91 | 3.44 | 3.26 | -3.72 | I |
| LIGUSTILIDE                     | 13.92  | 1.67 | 2.57 | 1.51 | 2.67 | 0.06  | I |
| LIMONIN                         | 240.25 | 4.03 | 4.28 | 3.58 | 3.52 | -2.12 | I |
| LIQUIRITIGENIN DIMETHYL ETHER   | 52.47  | 3.06 | 3.16 | 2.75 | 3.01 | -0.82 | I |
| LOBARIC ACID                    | 116.34 | 4.18 | 3.9  | 3.79 | 3.4  | -1.58 | I |
| LOGANIC ACID                    | 79.08  | 3.65 | 3.32 | 3.15 | 3.09 | -0.81 | I |
| LOGANIN                         | 85.57  | 3.75 | 3.39 | 3.24 | 3.11 | -1.34 | I |
| LONCHOCARPIC ACID               | 146.18 | 4.09 | 3.93 | 3.84 | 3.44 | -2.02 | I |
| MARMESIN ACETATE                | 52.7   | 3    | 3.23 | 2.55 | 2.98 | -1.05 | I |
| MELATONIN                       | 22.9   | 2.65 | 2.79 | 2.21 | 2.76 | -0.7  | I |
| MELEZITOSE                      | 132.93 | 4.44 | 3.58 | 3.65 | 3.24 | 0.07  | I |
| METHYL BENZOATE                 | 26.81  | 2.83 | 3    | 2.83 | 2.96 | -2.1  | I |
| METHYL COCLAURINE               | 58.31  | 3.15 | 3.29 | 2.87 | 3.08 | -0.88 | I |
| METHYLNORLIC HEXANTHONE         | 39.75  | 2.64 | 3.23 | 2.21 | 2.95 | -0.44 | I |
| METHYLXANTHOXYLIN               | 0      | 1.2  | 2.83 | 0.92 | 2.54 | -3.7  | I |
| MUNDULONE                       | 190.88 | 3.85 | 3.86 | 3.53 | 3.45 | 0.37  | I |

## Annex 1. Cont.

|                                |        |      |      |      |      |       |   |
|--------------------------------|--------|------|------|------|------|-------|---|
| MUNDULONE ACETATE              | 234.3  | 3.98 | 3.99 | 3.67 | 3.51 | -0.17 | I |
| NILOTICIN                      | 213.75 | 3.87 | 4.15 | 3.7  | 3.58 | -0.96 | I |
| NOMILIN                        | 254.75 | 4.31 | 4.42 | 3.85 | 3.57 | -3.49 | I |
| NONIC ACID                     | -19.75 | 1.99 | 2.31 | 1.4  | 2.38 | -2.14 | I |
| NORSTICTIC ACID                | 92.85  | 3.77 | 3.68 | 3.25 | 3.2  | -2.11 | I |
| OBLIQUIN                       | 34.82  | 2.52 | 2.91 | 2.23 | 2.84 | -0.71 | I |
| ODORATONE                      | 206.06 | 3.98 | 4.18 | 3.8  | 3.59 | -1.16 | I |
| OLEANOLIC ACID ACETATE         | 203.6  | 4.03 | 4.37 | 3.83 | 3.65 | -1.87 | I |
| ORSELLINIC ACID DIMETHYL ETHER | 0      | 1.3  | 2.63 | 0.71 | 2.46 | -1.24 | I |
| ORSELLINIC ACID. ETHYL ESTER   | 0      | 1.2  | 2.52 | 0.92 | 2.51 | -1.13 | I |
| OSAJIN                         | 134.28 | 3.83 | 3.8  | 3.61 | 3.41 | -0.72 | I |
| OSTHOL                         | 21.9   | 2.62 | 3.06 | 2.49 | 2.85 | -4.12 | I |
| <i>o</i> -VERATRALDEHYDE       | 0      | 0    | 2.38 | 0    | 2.33 | -3.05 | I |
| OXONITINE                      | 436.89 | 4.97 | 4.64 | 4.4  | 3.74 | -3.4  | I |
| PACHYRRHIZIN                   | 120.84 | 3.46 | 3.46 | 3.03 | 3.18 | 0.06  | I |
| PACHYRRHIZONE                  | 143.53 | 3.55 | 3.67 | 3.09 | 3.26 | -0.38 | I |
| PACLITAXEL                     | 963.42 | 5.33 | 4.73 | 4.87 | 4.06 | -0.06 | I |
| PAEONOL                        | 0      | 1.2  | 2.21 | 0.92 | 2.38 | -1.07 | I |
| PENICILLIC ACID                | 0      | 0    | 2.31 | 0    | 2.28 | -3.74 | I |
| PERSITOL HEPTAACETATE          | -86.01 | 4.77 | 3.78 | 4.06 | 3.16 | -5.27 | I |
| PEUCEDANIN                     | 38.87  | 2.64 | 3.17 | 2.21 | 2.9  | -1.34 | I |
| PEUCENIN                       | 23.32  | 2.37 | 3.09 | 2.2  | 2.91 | -1.6  | I |
| PHYSCION                       | 42.59  | 2.62 | 3.39 | 2.26 | 3.03 | -0.69 | I |
| PIPLARTINE                     | 40.16  | 3.26 | 3.23 | 2.83 | 2.97 | -2.23 | I |
| PODOFILOX                      | 161.99 | 4.16 | 3.88 | 3.54 | 3.31 | -2.13 | I |
| PODOPHYLLOTOXIN ACETATE        | 196.18 | 4.37 | 4.01 | 3.75 | 3.38 | -2.66 | I |
| POMIFERIN                      | 142.78 | 3.88 | 3.82 | 3.64 | 3.42 | -0.53 | I |
| PRIMULETIN                     | 36.33  | 2.57 | 2.99 | 2.36 | 2.94 | 0.05  | I |
| PRISTIMEROL                    | 180.76 | 4    | 4.27 | 3.78 | 3.59 | -1.79 | I |
| PROTOPORPHYRIN IX              | 294.45 | 4.64 | 4.24 | 4.51 | 3.73 | -0.92 | I |
| PSEUDO-ANISATIN                | 36.73  | 0    | 3.61 | 0    | 3.01 | 1.79  | A |
| PTERIN-6-CARBOXYLIC ACID       | 13.75  | 1.58 | 2.49 | 1    | 2.48 | -0.14 | I |
| PTERYXIN                       | 84.81  | 4.02 | 3.69 | 3.64 | 3.22 | -3.77 | I |
| PYRROMYCIN                     | 301.73 | 4.6  | 4.25 | 4.15 | 3.64 | -0.54 | I |
| QUASSIN                        | 91.89  | 3.66 | 4.07 | 3.13 | 3.3  | -3.44 | I |
| QUEBRACHITOL                   | 0      | 0    | 2.16 | 0    | 2.32 | -0.62 | I |
| QUERCETIN PENTAMETHYL ETHER    | 79.46  | 3.71 | 3.63 | 3.24 | 3.13 | -3.61 | I |
| RETUSIN 7-METHYL ETHER         | 55.86  | 3.1  | 3.27 | 2.71 | 3.03 | -0.9  | I |
| RHAMNETIN                      | 57.76  | 3.39 | 3.28 | 2.83 | 3.05 | 0.17  | I |
| ROBUSTONE                      | 136.96 | 3.54 | 3.57 | 3.18 | 3.28 | 0.59  | I |
| ROTENONE                       | 148.91 | 3.67 | 3.78 | 3.31 | 3.33 | -0.91 | I |
| RUBESCENSIN A                  | 93.33  | 2.91 | 3.97 | 2.53 | 3.3  | -0.85 | I |
| RUTILANTINONE                  | 122.17 | 4    | 3.97 | 3.42 | 3.39 | -0.52 | I |
| SALICIN                        | 27.45  | 3.18 | 2.89 | 2.67 | 2.84 | -0.83 | I |
| SALSOLIDINE                    | 13.69  | 1.43 | 2.8  | 1.31 | 2.64 | -2.85 | I |
| SALSOLINE                      | 11.67  | 0.69 | 2.64 | 0.69 | 2.61 | -0.35 | I |
| SALVINORIN A                   | 134.4  | 4.13 | 4    | 3.65 | 3.35 | -3.4  | I |
| SALVINORIN B                   | 108    | 3.7  | 3.89 | 3.23 | 3.28 | -2.6  | I |
| SAPPANONE A TRIMETHYL ETHER    | 73     | 3.33 | 3.34 | 2.95 | 3.1  | -0.76 | I |
| SCANDENIN                      | 146.55 | 4.07 | 3.93 | 3.83 | 3.44 | -2.05 | I |
| SCANDENIN DIACETATE            | 208.19 | 4.4  | 4.14 | 4.13 | 3.55 | -2.41 | I |
| SELINIDIN                      | 66.61  | 3.39 | 3.42 | 3.07 | 3.12 | -1.71 | I |
| SERICETIN                      | 130.07 | 3.93 | 3.82 | 3.72 | 3.41 | -1.36 | I |
| SINAPIC ACID METHYL ETHER      | 0      | 2.71 | 2.88 | 1.89 | 2.61 | -2.67 | I |
| SINENSETIN                     | 80.9   | 3.52 | 3.63 | 3.11 | 3.13 | -3.51 | I |
| SOLIDAGENONE                   | 59.69  | 3.14 | 3.67 | 2.89 | 3.17 | -2.99 | I |
| STICTIC ACID                   | 100.8  | 3.88 | 3.75 | 3.36 | 3.22 | -2.93 | I |
| STRYCHNINE                     | 104.53 | 2.49 | 4.01 | 2.26 | 3.34 | -0.31 | I |
| SUMARESINOLIC ACID             | 170.79 | 3.91 | 4.33 | 3.71 | 3.61 | -1.91 | I |
| TANGERITIN                     | 78.21  | 3.5  | 3.66 | 3.14 | 3.13 | -4.32 | I |

## Annex 1. Cont.

|                                                                                                                 |        |      |      |      |      |       |   |
|-----------------------------------------------------------------------------------------------------------------|--------|------|------|------|------|-------|---|
| TETRAHYDROFURAN-3-YL)-6-OXO-10,10-DIMETHYLBICYCLO[7: 2: 0]UNDECANE<br>2-PROPYL-3-HYDROXY<br>ETHYLENEPYRAN-4-ONE | 0      | 0.85 | 2.51 | 0.41 | 2.47 | 0.53  | I |
| TETRAHYDROPALMATINE                                                                                             | 97     | 3.4  | 3.67 | 3.13 | 3.2  | -3.04 | I |
| THEOBROMINE                                                                                                     | 9.68   | 0    | 2.38 | 0    | 2.32 | -3.39 | I |
| TOTARALOLAL                                                                                                     | 47.04  | 2.79 | 3.73 | 2.57 | 3.17 | -2.49 | I |
| TOTAROL                                                                                                         | 42.4   | 2.62 | 3.69 | 2.49 | 3.16 | -2.82 | I |
| TOTAROL ACETATE<br>METHYL ESTER                                                                                 | 58.57  | 3.06 | 3.83 | 2.89 | 3.23 | -3.51 | I |
| TOTAROL-19-CARBOXYLIC ACID<br>METHYL ESTER                                                                      | 57.08  | 3.04 | 3.83 | 2.78 | 3.21 | -3.14 | I |
| TRIACETYLRÉSVERATROL                                                                                            | 53.36  | 3.41 | 3.36 | 3.1  | 3.14 | -0.56 | I |
| TRIDESACETOXYKHIVORIN                                                                                           | 198.91 | 3.91 | 4.26 | 3.5  | 3.51 | -2.05 | I |
| TUBAIC ACID                                                                                                     | 16.45  | 1.73 | 2.8  | 1.39 | 2.73 | 0.54  | I |
| URSINOIC ACID                                                                                                   | 25.49  | 2.87 | 3.23 | 2.41 | 2.9  | -2.42 | I |
| URSOLIC ACID                                                                                                    | 162.65 | 3.83 | 4.32 | 3.65 | 3.59 | -1.99 | I |
| UTILIN                                                                                                          | 839.81 | 5.5  | 4.87 | 4.98 | 3.96 | -4.07 | I |
| VERATRIC ACID                                                                                                   | 0      | 1.3  | 2.36 | 0.71 | 2.37 | -0.61 | I |
| VINCAMINE                                                                                                       | 102.14 | 3.23 | 3.98 | 2.98 | 3.28 | -4.06 | I |
| VINDOLINE                                                                                                       | 166.58 | 4.04 | 4.35 | 3.64 | 3.43 | -5.81 | I |
| VIOLASTYRENE                                                                                                    | 32.22  | 2.96 | 3.01 | 2.78 | 2.96 | -1.11 | I |
| VISNAGIN                                                                                                        | 28.98  | 1.39 | 3.06 | 1.39 | 2.78 | -2.94 | I |
| XANTHYLETIN                                                                                                     | 29.13  | 2.27 | 2.91 | 2.08 | 2.85 | -0.6  | I |
| XYLOCARPUS A                                                                                                    | 326.83 | 4.7  | 4.52 | 4.24 | 3.66 | -3.8  | I |
| ZEORIN                                                                                                          | 1646.1 | 5.45 | 4.95 | 4.96 | 4.24 | -0.99 | I |
